# Supplementary material for: Construct and concurrent validity of a patient-reported adverse drug event questionnaire: a cross-sectional study
Source: Springer Nature journal article supplement (doi:10.1186/s12955-014-0103-6), 2014-08-12
Supplement: MOESM2 [file 9763744]

**Additional file 2.** Characteristics of patients who mentioned ≥1 particular drugs and who mentioned no particular drugs for their ADE

|  | Patients who mentioned ≥1 particular drugs to ≥1 ADEs  (N=25) | Patients who did not mention a particular drug to any of their ADEs  (N=12) | P-value |
| --- | --- | --- | --- |
| Mean age in years (SD) | 61 (10) | 67 (10) | 0.118* |
| Education (%) |  |  | 1.000† |
| Lower education | 7 (28) | 4 (33) |  |
| Middle education | 8 (32) | 4 (33) |  |
| Higher education | 9 (36) | 4 (33) |  |
| Other | 1 (4) | 0 (0) |  |
| Female (%) | 8 (32) | 3 (25) | 0.663‡ |
| ADE = Adverse drug event; SD = Standard deviation  * = T-test; † = Fisher-Freeman-Halton test; ‡ = χ²-test | | | |
